# Supplementary material
Source: Research Square preprint supplement (doi:10.21203/rs.3.rs-9359509/v1)
Supplement: Supplementary file 1 [file 443708eef91dfaeba5cd6190.docx]

**Additional file 1**

**Supplementary tables supporting the preliminary local evaluation**

This supplementary file provides the detailed tables that support the preliminary local evaluation reported in the revised Advancing Simulation Practice manuscript.

**Supplementary Table S1. Baseline characteristics of the two resident cohorts**

| Variables | Control, n (%) | Intervention, n (%) | Total, n (%) | P value |
| --- | --- | --- | --- | --- |
| Gender | |  |  | 0.754 |
| Male | 9 (30.0%) | 8 (26.7%) | 17 (28.3%) |  |
| Female | 21 (70.0%) | 22 (73.3%) | 43 (71.7%) |  |
| Age (years) | |  |  | 0.576 |
| ≤ 26 | 22 (73.3%) | 23 (76.7%) | 45 (75.0%) |  |
| > 26 | 8 (26.7%) | 7 (23.3%) | 15 (25.0%) |  |
| Prior Communication Training | | | | 0.542 |
| Yes | 9 (30.0%) | 10 (33.3%) | 19 (31.7%) |  |
| No | 21 (70.0%) | 20 (66.7%) | 41 (68.3%) |  |

**Supplementary Table S2. Detailed SEGUE Framework scores in the two study groups**

| SEGUE Dimension | Max Score | Median (IQR) | | P valueᵃ | Score Rate (%)ᵇ | | P valueᶜ |
| --- | --- | --- | --- | --- | --- | --- | --- |
|  |  | Control | Intervention |  | Control | Intervention |  |
| Set the Stage | 5 | 4 (4–5) | 5 (4–5) | 0.089 | 80.0 | 93.3 | 0.12 |
| Elicit Information | 10 | 7 (6–8) | 9 (8–10) | <0.001 | 70.0 | 86.7 | <0.001 |
| Give Information | 4 | 3 (2–3) | 3 (3–4) | 0.008 | 65.0 | 80.0 | 0.015 |
| Understand Patient's Perspective | 4 | 2 (2–3) | 3 (3–4) | <0.001 | 55.0 | 78.3 | <0.001 |
| End the Encounter | 2 | 1 (1–1) | 2 (1–2) | <0.001 | 50.0 | 81.7 | <0.001 |
| Total Score | 25 | 17 (15–19) | 22 (20–24) | <0.001 | 68.0 | 84.0 | <0.001 |

**Supplementary Table S3. Detailed modified CPPC-AS scores in the two study groups**

| CPPC-AS Dimension | Max Score | Control Median (IQR) | Intervention Median (IQR) | Z value | P value |
| --- | --- | --- | --- | --- | --- |
| **Task Score** | **40** | **32 (30–34)** | **36 (34–38)** | **-4.2** | **<0.001** |
| Information Collection | 5 | 4 (3–4) | 4 (4–5) |  |  |
| Information Verification | 5 | 3 (3–4) | 4 (4–5) |  |  |
| Transition Management | 5 | 4 (3–4) | 4 (4–5) |  |  |
| Time Management | 5 | 3 (3–4) | 4 (3–4) |  |  |
| Patient Education | 5 | 3 (2–4) | 4 (4–5) |  |  |
| Informed Consent Process | 5 | 3 (2–3) | 5 (4–5) |  |  |
| Emotional Support | 5 | 3 (2–3) | 4 (3–5) |  |  |
| Closing and Follow-up | 5 | 3 (2–3) | 4 (4–5) |  |  |
| **Performance Score** | **60** | **48 (45–51)** | **55 (52–58)** | **-4.0** | **<0.001** |
| Demeanor and Appearance | 5 | 4 (4–5) | 4 (4–5) |  |  |
| Respect and Empathy | 5 | 4 (3–4) | 5 (4–5) |  |  |
| Listening Skills | 5 | 3 (3–4) | 4 (4–5) |  |  |
| Verbal Expression | 5 | 4 (3–4) | 4 (4–5) |  |  |
| Non-verbal Communication | 5 | 3 (3–4) | 4 (4–5) |  |  |
| Questioning Skills | 5 | 4 (3–4) | 4 (4–5) |  |  |
| Feedback and Confirmation | 5 | 3 (3–4) | 4 (4–5) |  |  |
| Initiative and Control | 5 | 4 (3–4) | 4 (4–5) |  |  |
| Medical Ethics Adherence | 5 | 4 (4–5) | 5 (4–5) |  |  |
| Humanistic Care | 5 | 3 (3–4) | 4 (4–5) |  |  |
| Relationship Building | 5 | 3 (2–4) | 4 (4–5) |  |  |
| Overall Impression | 5 | 4 (3–4) | 5 (4–5) |  |  |
| **Total Score** | **100** | **80 (77–84)** | **91 (88–94)** | **-4.5** | **<0.001** |

**Supplementary Table S4. Detailed CARE measure results in the two study groups**

| CARE Measure Item | Control Excellent n (%) | Intervention Excellent n (%) | χ² | P value |
| --- | --- | --- | --- | --- |
| 1. Making you feel at ease | 14 (46.7) | 26 (86.7) | 10.8 | <0.001 |
| 2. Letting you tell your "story" | 16 (53.3) | 24 (80.0) | 5.2 | 0.023 |
| 3. Really listening | 17 (56.7) | 25 (83.3) | 5.4 | 0.020 |
| 4. Being interested in you as a whole person | 12 (40.0) | 22 (73.3) | 6.9 | 0.009 |
| 5. Fully understanding your concerns | 18 (60.0) | 20 (66.7) | 0.4 | 0.525 |
| 6. Being compassionate | 19 (63.3) | 24 (80.0) | 2.4 | 0.123 |
| 7. Being positive | 13 (43.3) | 24 (80.0) | 8.6 | 0.003 |
| 8. Explaining things clearly | 12 (40.0) | 23 (76.7) | 8.1 | 0.004 |
| 9. Helping you to help yourself | 15 (50.0) | 18 (60.0) | 0.8 | 0.371 |
| 10. Deciding on a treatment plan with you | 20 (66.7) | 22 (73.3) | 0.4 | 0.525 |
| Total CARE Score | 43 (38–46) | 47 (44–49) | -3.6 | <0.001 |

**Supplementary Table S5. Exploratory stress, confidence, and training-satisfaction outcomes**

| Outcome Measure | Timing | Control Median (IQR) | Intervention Median (IQR) | Z value | P value |
| --- | --- | --- | --- | --- | --- |
| Perceived Stress (VAS 0-100) | | | |  |  |
| Difficult conversation stress | Pre-training | 72 (65–78) | 70 (63–76) | -0.4 | 0.689 |
|  | Post-training | 68 (60–75) | 45 (38–52) | -4.8 | <0.001 |
|  | Change score | -4 (-8 to 0) | -25 (-30 to -20) | -4.5 | <0.001 |
| Confidence (5-point Likert scale) | | | |  |  |
| Managing preoperative anxiety | Pre-training | 2 (2–3) | 2 (2–3) | -0.2 | 0.843 |
|  | Post-training | 3 (2–3) | 4 (4–5) | -4.2 | <0.001 |
|  | Change score | +1 (0 to +1) | +2 (+2 to +3) | -3.8 | <0.001 |
| Delivering bad news about complications | Pre-training | 2 (1–2) | 2 (1–2) | -0.3 | 0.764 |
|  | Post-training | 2 (2–3) | 4 (3–4) | -4.5 | <0.001 |
|  | Change score | 0 (0 to +1) | +2 (+1 to +2) | -4.0 | <0.001 |
| Conducting family conferences | Pre-training | 2 (2–3) | 2 (2–3) | -0.1 | 0.917 |
|  | Post-training | 3 (2–3) | 4 (4–5) | -4.3 | <0.001 |
|  | Change score | +1 (0 to +1) | +2 (+2 to +3) | -3.9 | <0.001 |
| Training Satisfaction | | |  |  |  |
| Overall training quality (1-10) | Post-training | 6 (5–7) | 9 (8–9) | -4.6 | <0.001 |
| Would recommend to peers (n, %) | Post-training | 18 (60.0) | 29 (96.7) | 10.5 | 0.001 |
